# Supplementary material
Source: HighWire-hosted journal article supplement (http://ajnr.org/highwire/filestream/107231/field_highwire_adjunct_files/0/0950.pdf)
Supplement: 0950.pdf [file 0950.pdf]

**Supplementary Table 1.** Search strategy, written for PubMed, and adapted for other databases.

1. "traumatic brain injury" [MeSH]
2. "TBI" [tw]
3. "mild TBI" [tw]
4. "mild traumatic brain injury" [tw]
5. "mTBI" [tw]
6. "brain concussion" [MeSH]
7. "concussion" [tw]
8. 1 OR 2 OR 3 OR 4 OR 5 OR 6 OR 7
9. "functional magnetic resonance imaging" [MeSH]
10. "rs-fMRI" [tw]
11. "resting state fMRI" [tw]
12. "functional MRI" [tw]
13. "fMRI" [tw]
14. 9 OR 10 OR 11 OR 12 OR 13
15. 8 AND 14

**Supplementary Table 2.** Summary of demographic, technical, and statistical data from included papers.

| Author, Year                                        | # of Subjects: HC, mTBI | Mean Age: HC, mTBI | % female (HC, mTBI) | Echo/ Repetition Time (ms) | rs-fMRI duration (minutes) | Scanner Field Strength | Processing Software  | Atlas    | Statistical Test                             | Multiple Comparison? |
|-----------------------------------------------------|-------------------------|--------------------|---------------------|----------------------------|----------------------------|------------------------|----------------------|----------|----------------------------------------------|----------------------|
| Bittencourt et. al., 2022 <sup>11</sup>             | 20, 25                  | 67.00, 68.00       | 45%, 36%            | 22.1/2000                  | 10.0                       | 3T                     | SPM12, GIFT          | MNI      | t-test                                       | Yes                  |
| Kim et. al., 2022 <sup>12</sup>                     | 29, 29                  | 42.80, 43.30       | 52%, 52%            | 30/3500                    | 6.8                        | 3T                     | FSL                  | MNI      | t-test                                       | No                   |
| Li et. al., 2022 <sup>13</sup>                      | 85, 88                  | 39.20, 40.20       | 55%, 51%            | 30/2000                    | N/A                        | 3T                     | SPM12, DPABI, GREYNA | MNI      | t-test                                       | Yes                  |
| Li et. al., 2022 <sup>14</sup>                      | 55, 55                  | 40.70, 41.10       | 58%, 51%            | 30/2000                    | 8.2                        | 3T                     | SPM8, GREYNA         | MNI      | t-test, AUC                                  | Yes                  |
| Lu et. al., 2022 <sup>15</sup>                      | 70, 76                  | 45.60, 43.80       | 46%, 57%            | 30/2000                    | 7.7                        | 3T                     | GREYNA               | MNI      | t-test, Mann-Whitney                         | Yes                  |
| Amir et. al., 2021 <sup>16</sup>                    | 26, 27                  | 43.20, 43.90       | 69%, 70%            | 30/2250                    | 8.0                        | 3T                     | CONN (SPM12)         | MNI      | t-test, nonparametric voxel-wise             | Yes                  |
| Bajaj et. al., 2021 <sup>17</sup>                   | 41, 28                  | 26.07, 21.50       | 61%, 54%            | 30/2000                    | 6.0                        | 3T                     | CONN (SPM12)         | MNI      | Baysian GLM (Posterior Probability Analysis) | No                   |
| Bittencourt-Villalpando et. al., 2021 <sup>18</sup> | 20, 54                  | 30.00, 35.00       | 30%, 33%            | 20/2000                    | 10.0                       | 3T                     | SPM12, GIFT          | MNI      | t-test, MANCOVA                              | Yes                  |
| Jia et. al., 2021 <sup>19</sup>                     | 42, 92                  | 40.50, 40.30       | 55%, 52%            | 30/2500                    | 7.5                        | 3T                     | SPM, DPABI           | MNI      | t-test, Mann-Whitney                         | Yes                  |
| Shi et. al., 2021 <sup>20</sup>                     | 50, 50                  | 24.10, 24.30       | 50%, 50%            | N/A                        | N/A                        | 3T                     | AFNI                 | MNI      | t-test                                       | No                   |
| Sun et. al., 2021 <sup>21</sup>                     | 41, 60                  | 37.60, 36.10       | 51%, 42%            | 30/2500                    | 7.5                        | 3T                     | SPM8, GREYNA         | MNI      | t-test, Mann-Whitney                         | Yes                  |
| Vedaei et. al., 2021 <sup>8</sup>                   | 40, 64                  | 40.30, 46.00       | 47%, 61%            | 30/2000                    | 6.0                        | 3T                     | SPM12                | MNI      | t-test                                       | Yes                  |
| Wang et. al., 2021 <sup>74</sup>                    | 37, 30                  | 37.90, 40.50       | 46%, 40%            | 40/2000                    | 16.0                       | 1.5T                   | ASL                  | MNI, AAL | t-test, Mann-Whitney                         | Yes                  |

|                                       |        |                 |          |         |      |      |                      |                    |                        |     |
|---------------------------------------|--------|-----------------|----------|---------|------|------|----------------------|--------------------|------------------------|-----|
| Wang et. al., 2021 <sup>22</sup>      | 33, 25 | 35.80,<br>35.60 | 52%, 48% | 30/2000 | 8.0  | 3T   | SPM8                 | MNI                | t-test                 | Yes |
| Wang et. al., 2021 <sup>23</sup>      | 42, 42 | 38.00,<br>37.40 | 43%, 45% | 40/2000 | 16.0 | 1.5T | SPM8, FSL            | MNI                | t-test, Mann-Whitney   | Yes |
| Zhang et. al., 2021 <sup>24</sup>     | 46, 46 | 35.90,<br>34.70 | 54%, 50% | 30/2500 | N/A  | 3T   | SPM12                | MNI                | t-test                 | No  |
| D'Souza et. al., 2020 <sup>25</sup>   | 60, 60 | 30.82,<br>30.40 | 38%, 39% | 30/2000 | 6.83 | 3T   | FSL                  | MNI                | TFCE                   | Yes |
| Li et. al., 2020 <sup>26</sup>        | 32, 58 | 42.00,<br>37.70 | 50%, 48% | 25/2000 | 8.1  | 3T   | SPM8, REST           | MNI                | t-test                 | Yes |
| Li et. al., 2020 <sup>27</sup>        | 43, 50 | 41.70,<br>43.80 | 56%, 52% | 30/2000 | 8.1  | 3T   | DPABI                | MNI                | t-test                 | Yes |
| Liu et. al., 2020 <sup>28</sup>       | 37, 32 | 31.00,<br>30.00 | 57%, 63% | 35/1500 | 5.4  | 3T   | FSL, AFNI            | MNI                | t-test                 | Yes |
| Lu et. al., 2020 <sup>29</sup>        | 37, 53 | 41.40,<br>38.00 | 65%, 49% | 30/2000 | 8.1  | 3T   | REST                 | MNI                | t-test                 | Yes |
| Lu et. al., 2020 <sup>30</sup>        | 43, 71 | 43.50,<br>40.70 | 60%, 56% | 30/2000 | 8.1  | 3T   | SPM8, REST           | MNI                | t-test, ANOVA          | Yes |
| Shafi et. al., 2020 <sup>31</sup>     | 31, 80 | 36.30,<br>32.30 | 41%, 45% | 25/2500 | N/A  | 3T   | SPM8, AFNI           | MNI                | t-test                 | Yes |
| Chong et. al., 2019 <sup>32</sup>     | 15, 15 | 39.10,<br>39.10 | 87%, 87% | 27/2500 | 10.0 | 3T   | SPM8                 | MNI                | t-test                 | Yes |
| Hou et. al., 2019 <sup>33</sup>       | 30, 47 | 40.20,<br>41.70 | 40%, 28% | 30/2000 | 5.6  | 3T   | SPM8, AFNI           | Talairach          | ANOVA, post-hoc t-test | No  |
| Kuceyeski et. al., 2019 <sup>34</sup> | 34, 27 | 28.60,<br>29.10 | 26%, 22% | NA      | 7.0  | 3T   | SPM12,<br>FreeSurfer | MNI                | t-test                 | Yes |
| Li et. al., 2019 <sup>35</sup>        | 41, 55 | 43.20,<br>40.70 | 54%, 51% | 30/2000 | 8.1  | 3T   | SPM8, REST,<br>DPABI | MNI                | t-test, GCA            | Yes |
| Lu et. al., 2019 <sup>36</sup>        | 30, 58 | 42.50,<br>38.80 | 60%, 43% | 30/2000 | 8.1  | 3T   | SPM8, REST           | AAL                | t-test                 | Yes |
| Niu et. al., 2019 <sup>37</sup>       | 46, 70 | 34.90,<br>34.70 | 50%, 36% | N/A     | N/A  | 3T   | FSL                  | MNI                | t-test, Mann-Whitney   | Yes |
| Dailey et. al., 2018 <sup>38</sup>    | 14, 15 | 23.88,<br>21.86 | 71%, 73% | 25/2000 | 10.0 | 3T   | CONN<br>(SPM12)      | MNI, Shirer et al. | GLM analysis           | Yes |

|                                          |        |                  |          |            |      |      |               |                        |                                    |     |
|------------------------------------------|--------|------------------|----------|------------|------|------|---------------|------------------------|------------------------------------|-----|
| Wang et. al., 2018 <sup>39</sup>         | 34, 54 | 32.95, 35.50     | 50%, 50% | 30/2000    | N/A  | 3T   | FSL           | MNI                    | t-test, Mann-Whitney               | No  |
| Xu et. al., 2018 <sup>40</sup>           | 35, 50 | 35.50, 37.20     | 60%, 40% | 30/2500    | 7.5  | 3T   | FSL           | MNI, Brainnetome atlas | t-test                             | Yes |
| Dall'Acqua et. al., 2017 <sup>41</sup>   | 49, 49 | 35.00, 34.90     | 63%, 63% | 15.19/2220 | 5.19 | 3T   | SPM8          | MNI, AAL               | Cohen's d                          | Yes |
| Palacios et. al., 2017 <sup>42</sup>     | 47, 75 | 28.80, 32.20     | N/A, N/A | 28/2000    | N/A  | 3T   | FSL           | MNI                    | GLM analysis                       | Yes |
| Rajesh et. al., 2017 <sup>43</sup>       | 22, 22 | 36.20, 36.30     | 50%, 50% | 25/2000    | 2.5  | 3T   | FSL, AFNI     | MNI                    | t-test                             | Yes |
| van der Horn et. al., 2017 <sup>44</sup> | 20, 54 | [18-61], [19-64] | 30%, 33% | 20/2000    | 10.0 | 3T   | SPM12         | MNI                    | AUC                                | Yes |
| van der Horn et. al., 2017 <sup>45</sup> | 20, 49 | [18-61], [19-62] | 30%, 33% | 20/2000    | 10.0 | 3T   | SPM12         | MNI                    | t-test, ANOVA                      | Yes |
| Vergara et. al., 2017 <sup>46</sup>      | 50, 50 | N/A, 27.90       | 50%, 50% | 29/2000    | 5.0  | 3T   | SPM6          | MNI                    | t-test, MANOVA, ANOVA              | No  |
| Vergara et. al., 2017 <sup>47</sup>      | 47, 47 | N/A, 27.30       | N/A, N/A | 29/2000    | 5.0  | 3T   | SPM           | MNI                    | t-test                             | Yes |
| Yan et. al., 2017 <sup>48</sup>          | 18, 18 | 38.70, 39.90     | 28%, 11% | 24/1900    | N/A  | 1.5T | SPM8, REST    | MNI, AAL               | t-test, Granger Causality analysis | No  |
| Yan et. al., 2017 <sup>49</sup>          | 17, 22 | [20-59], [18-60] | 24%, 23% | 40/2000    | 6.2  | 1.5T | GRETNA        | AAL90, Dosenbach160    | t-test                             | No  |
| Zhou et. al., 2017 <sup>50</sup>         | 22, 24 | 37.00, 34.20     | 59%, 29% | 30/2300    | 5.1  | 3T   | FSL           | MNI                    | t-test                             | No  |
| Astafiev et. al., 2016 <sup>51</sup>     | 20, 17 | [18-60], [18-60] | 50%, 57% | 27/2000    | 4.3  | 3T   | In-house      | Talairach              | t-test                             | Yes |
| Banks et. al., 2016 <sup>52</sup>        | 11, 13 | 37.60, 39.30     | 36%, 31% | 35/2000    | 10.0 | 3T   | SPM8          | MNI                    | t-test                             | Yes |
| Iraji et. al., 2016 <sup>53</sup>        | 24, 16 | 28.00, 34.50     | 17%, 38% | 30/2000    | 8.0  | 3T   | FSL, MedINRIA | N/A                    | ANOVA, NBS                         | Yes |

|                                          |        |                     |          |         |      |      |                   |                    |                                          |     |
|------------------------------------------|--------|---------------------|----------|---------|------|------|-------------------|--------------------|------------------------------------------|-----|
| Nordin et. al., 2016 <sup>54</sup>       | 10, 10 | 36.90,<br>37.50     | 50%, 50% | 35/2000 | 8.0  | 3T   | FSL, AFNI         | MNI                | ANOVA                                    | No  |
| van der Horn et. al., 2016 <sup>55</sup> | 20, 54 | [18-45],<br>[19-64] | 30%, 33% | 20/2000 | 10.0 | 3T   | SPM12             | MNI                | t-test, ANOVA                            | Yes |
| Xiong et. al., 2016 <sup>56</sup>        | 25, 25 | 31.50,<br>32.50     | 40%, 36% | 29/2000 | 8.0  | 3T   | SPM5              | AAL                | t-test                                   | No  |
| Yan et. al., 2016 <sup>57</sup>          | 19, 19 | 36.60,<br>38.20     | 32%, 16% | 24/2000 | N/A  | 1.5T | SPM, FSL,<br>REST | MNI, AAL           | t-test, Granger<br>Causality<br>analysis | No  |
| Bharath et. al., 2015 <sup>58</sup>      | 20, 15 | N/A, N/A            | N/A, N/A | 35/3000 | 9.0  | 3T   | SPM8, FSL         | MNI, ICA-<br>based | t-test                                   | No  |
| Iraji et. al., 2015 <sup>59</sup>        | 12, 16 | 33.00,<br>37.00     | 44%, 50% | 30/2000 | 8.0  | 3T   | FSL               | MNI, ICA-<br>based | t-test                                   | Yes |
| Mayer et. al., 2015 <sup>60</sup>        | 48, 48 | 27.90,<br>28.30     | 52%, 52% | 29/2000 | 5.0  | 3T   | N/A               | MNI                | ANCOVA                                   | Yes |
| Sours et. al., 2015 <sup>61</sup>        | 31, 32 | 37.30,<br>41.70     | 45%, 34% | 30/2000 | 5.7  | 3T   | AFNI              | MNI                | ANCOVA                                   | Yes |
| Sours et. al., 2015 <sup>62</sup>        | 35, 77 | 37.20,<br>44.00     | 46%, 23% | 30/2000 | 5.7  | 3T   | SPM8              | MNI                | t-test,<br>ANCOVA                        | No  |
| Sours et. al., 2015 <sup>63</sup>        | 30, 41 | 38.70,<br>43.70     | 47%, 27% | 30/2000 | 5.7  | 3T   | SPM8              | MNI                | t-test,<br>ANCOVA                        | Yes |
| Sours et. al., 2015 <sup>64</sup>        | 28, 28 | 39.30,<br>38.90     | 43%, 36% | 30/2000 | 5.7  | 3T   | SPM8              | MNI                | t-test,<br>ANCOVA                        | Yes |
| Vergara et. al., 2015 <sup>65</sup>      | 50, 50 | N/A,<br>27.90       | 50%, 50% | 29/2000 | 5.0  | 3T   | SPM5              | MNI                | t-test<br>(assumed)                      | Yes |
| Zhan et. al., 2015 <sup>66</sup>         | 15, 15 | 39.30,<br>38.50     | 60%, 60% | 30/2000 | 8.0  | 3T   | SPM8              | MNI                | t-test                                   | Yes |
| Zhou et. al., 2014 <sup>67</sup>         | 27, 27 | 35.40,<br>33.40     | 48%, 22% | 30/2000 | 5.1  | 3T   | FSL, AFNI         | MNI                | t-test                                   | Yes |
| Messe et. al., 2013 <sup>68</sup>        | 34, 55 | 36.80,<br>34.88     | 32%, 33% | 30/2650 | 10.0 | 3T   | SPM5              | MNI, AAL           | t-test, Mann-<br>Whitney                 | Yes |
| Sours et. al., 2013 <sup>69</sup>        | 14, 23 | 37.10,<br>39.50     | 43%, 52% | 30/2000 | 5.7  | 3T   | SPM8              | MNI                | t-test, ANOVA                            | Yes |

|                                       |        |                     |          |         |      |    |           |           |              |     |
|---------------------------------------|--------|---------------------|----------|---------|------|----|-----------|-----------|--------------|-----|
| Shumskaya et. al., 2012 <sup>70</sup> | 35, 35 | [19-59],<br>[18-60] | 37%, 37% | 30/1350 | 6.0  | 3T | FSL       | MNI       | Mann-Whitney | No  |
| Stevens et. al., 2012 <sup>2</sup>    | 30, 30 | 28.90,<br>31.70     | 33%, 33% | 28/1500 | 5.25 | 3T | SPM8      | MNI       | t-test       | Yes |
| Zhou et. al., 2012 <sup>71</sup>      | 18, 23 | 32.60,<br>37.80     | N/A, 26% | 30/2000 | 5.1  | 3T | FSL, AFNI | MNI       | t-test       | Yes |
| Mayer et. al., 2011 <sup>72</sup>     | 26, 27 | 27.10,<br>27.20     | 58%, 56% | 29/2000 | 5.0  | 3T | AFNI      | Talairach | t-test       | Yes |
| Tang et. al., 2011 <sup>73</sup>      | 17, 24 | 35.20,<br>37.70     | N/A, 29% | 30/2000 | 5.1  | 3T | SPM2, FSL | MNI       | t-test       | Yes |

**Supplementary Table 3.** Summary of studied regions-of-interest (ROIs) and networks studied in every included study, time between mTBI and fMRI, as well as functional connectivity (FC) analysis methods and results. -2 means that relative to healthy controls, only decreased FC changes were seen in mTBI patients. -1 means more areas of decreased FC change than areas of increased FC change were seen. 0 means no FC changes were seen. Equal means the same number of areas of decreased and increased FC were seen. 1 means more areas of increased FC change than areas of decreased FC change were seen. 2 means only areas of increased FC changes were seen.

\*N/A = that analytic method was not applied in this study for that ROI or network.

\*ICA = independent components analysis. f(ALFF) = fractional amplitude of low-frequency fluctuations. ReHo = regional homogeneity.

\*Asym = no post-concussive symptoms at time of MRI; sym = post-concussive symptoms at time of MRI

\*aDMN = anterior default mode network, AN = attention network, AUDN = auditory network, BGN = basal ganglia network, BN = brainstem network, CCN = cognitive-control network, CEN = central executive network, CLN = cognitive-language network, CN = cerebellum network, CON = cingulo-opercular network, DAN = dorsal attention network, DLPFC = dorsolateral prefrontal cortex, DMN = default mode network, DVS = dorsal and ventral stream, ECN = executive control network, EMN = emotion network, EN = executive network, FPC = fronto-parietal control network, FPN = fronto-parietal network, LFPN = left fronto-parietal network, LSN = lower somatomotor network, LVN = lateral visual network, MN = motor network, MTL = medial temporal lobe, MSN = motor-striatal network, MVN = medial visual network, OFN = orbitofrontal network, pDMN = posterior default mode network, OCN = orbito-cerebellar network, RFPN = right fronto-parietal network, SMC = sensory motor cortex, SMN = sensorimotor network, SN = salience network, SPN = superior parietal network, TPN = task positive network, TRN = task related network, USN = upper somatomotor network, VAN = ventral attention network, VMPFC = ventromedial prefrontal cortex, VN = visual network, VS = ventral stream



| Author, Year                            | ROI/Network                                                                                                                                 | Time Between mTBI and fMRI                                                                                                                                                                                                                   | Seed/ROI to Seed/ROI | Seed/ROI to Voxel    | ICA                                                                                                                          | Graph Theory | Seed-based dynamic FC | ICA-based dynamic FC                                                                                                        | f(ALFF) | ReHo |
|-----------------------------------------|---------------------------------------------------------------------------------------------------------------------------------------------|----------------------------------------------------------------------------------------------------------------------------------------------------------------------------------------------------------------------------------------------|----------------------|----------------------|------------------------------------------------------------------------------------------------------------------------------|--------------|-----------------------|-----------------------------------------------------------------------------------------------------------------------------|---------|------|
| Bittencourt et. al., 2022 <sup>11</sup> | CLN<br>VN<br>Whole brain                                                                                                                    | 1-6 months<br>1-6 months<br>1-6 months                                                                                                                                                                                                       | N/A                  | N/A                  | 2<br>-2<br>Equal                                                                                                             | N/A          | N/A                   | N/A                                                                                                                         | N/A     | N/A  |
| Kim et. al., 2022 <sup>12</sup>         | Whole brain                                                                                                                                 | <1 month                                                                                                                                                                                                                                     | N/A                  | N/A                  | N/A                                                                                                                          | -1           | N/A                   | N/A                                                                                                                         | N/A     | N/A  |
| Li et. al., 2022 <sup>13</sup>          | Whole brain                                                                                                                                 | <1 month                                                                                                                                                                                                                                     | N/A                  | N/A                  | N/A                                                                                                                          | 2            | N/A                   | N/A                                                                                                                         | N/A     | N/A  |
| Li et. al., 2022 <sup>14</sup>          | Whole brain                                                                                                                                 | <1 month                                                                                                                                                                                                                                     | N/A                  | N/A                  | N/A                                                                                                                          | 1            | N/A                   | N/A                                                                                                                         | N/A     | N/A  |
| Lu et. al., 2022 <sup>15</sup>          | AUDN<br>AUDN<br>dAN<br>dAN<br>DMN<br>DMN<br>LFPN<br>LFPN<br>RFPN<br>RFPN<br>SMN<br>SMN<br>SN<br>SN<br>vAN<br>vAN<br>VN<br>VN<br>Whole brain | <1 month<br><1 month | N/A                  | N/A                  | -2<br>N/A<br>0<br>N/A<br>Equal<br>N/A<br>0<br>N/A<br>0<br>N/A<br>Equal<br>N/A<br>2<br>N/A<br>-1<br>N/A<br>Equal<br>N/A<br>-1 | N/A          | N/A                   | N/A<br>-2<br>N/A<br>-2<br>N/A<br>Equal<br>N/A<br>0<br>N/A<br>0<br>N/A<br>Equal<br>N/A<br>-2<br>N/A<br>-2<br>N/A<br>-2<br>-2 | N/A     | N/A  |
| Amir et. al., 2021 <sup>16</sup>        | DMN<br>SN<br>TPN<br>Whole brain                                                                                                             | >6 months<br>>6 months<br>>6 months<br>>6 months                                                                                                                                                                                             | 0<br>0<br>0<br>N/A   | -1<br>-1<br>0<br>N/A | N/A<br>N/A<br>N/A<br>1                                                                                                       | N/A          | N/A                   | N/A                                                                                                                         | N/A     | N/A  |

|                                                     |                                                       |                                                                            |                |          |     |                                  |     |     |     |     |
|-----------------------------------------------------|-------------------------------------------------------|----------------------------------------------------------------------------|----------------|----------|-----|----------------------------------|-----|-----|-----|-----|
| Bajaj et. al., 2021 <sup>17</sup>                   | DMN                                                   | >6 months                                                                  | -2             | N/A      | N/A | N/A                              | N/A | N/A | N/A | N/A |
| Bittencourt-Villalpando et. al., 2021 <sup>18</sup> | AUDN<br>CCN<br>CN<br>DMN<br>SMN<br>VN<br>Whole brain  | 1-6 months                                                                 | N/A            | N/A      | 0   | N/A                              | N/A | N/A | N/A | N/A |
| Jia et. al., 2021 <sup>19</sup>                     | White matter<br>White matter                          | <1 month<br>>6 months                                                      | 2<br>0         | N/A      | N/A | N/A                              | N/A | N/A | N/A | N/A |
| Shi et. al., 2021 <sup>20</sup>                     | Whole brain                                           | <1 month                                                                   | N/A            | N/A      | N/A | -1                               | N/A | N/A | 2   | -2  |
| Sun et. al., 2021 <sup>21</sup>                     | DMN<br>DMN<br>EN<br>EN<br>SN<br>SN                    | <1 month<br>1-6 months<br><1 month<br>1-6 months<br><1 month<br>1-6 months | N/A            | N/A      | N/A | -2<br>-2<br>-2<br>-2<br>-2<br>-2 | N/A | N/A | N/A | N/A |
| Vedaei et. al., 2021 <sup>8</sup>                   | Whole brain                                           | >6 months                                                                  | N/A            | 2        | N/A | N/A                              | N/A | N/A | 2   | 2   |
| Wang et. al., 2021 <sup>74</sup>                    | Whole brain                                           | <1 month<br>1-6 months<br>>6 months                                        | N/A            | N/A      | N/A | 0<br>0<br>0                      | N/A | N/A | N/A | N/A |
| Wang et. al., 2021 <sup>22</sup>                    | R inferior frontal gyrus<br>R superior temporal gyrus | <1 month<br><1 month                                                       | N/A            | -1<br>-1 | N/A | N/A                              | N/A | N/A | N/A | N/A |
| Wang et. al., 2021 <sup>23</sup>                    | Whole brain<br>Whole brain<br>Whole brain             | <1 month<br>1-6 months<br>>6 months                                        | -1<br>-2<br>-2 | N/A      | N/A | N/A                              | N/A | N/A | N/A | N/A |
| Zhang et. al., 2021 <sup>24</sup>                   | DMN                                                   | <1 month                                                                   | N/A            | -2       | N/A | N/A                              | N/A | N/A | N/A | N/A |
| D'Souza et. al., 2020 <sup>25</sup>                 | aDMN                                                  | <1 month                                                                   |                |          | -2  |                                  |     |     |     |     |

|                                |             |           |     |       |     |     |     |     |     |     |
|--------------------------------|-------------|-----------|-----|-------|-----|-----|-----|-----|-----|-----|
|                                | aDMN        | >6 months |     |       | -2  |     |     |     |     |     |
|                                | AUDN        | <1 month  |     |       | -2  |     |     |     |     |     |
|                                | AUDN        | >6 months |     |       | -2  |     |     |     |     |     |
|                                | CEN         | <1 month  |     |       | -2  |     |     |     |     |     |
|                                | CEN         | >6 months |     |       | 2   |     |     |     |     |     |
|                                | CN          | <1 month  |     |       | -2  |     |     |     |     |     |
|                                | CN          | >6 months |     |       | -2  |     |     |     |     |     |
|                                | DMN         | <1 month  |     |       | 0   |     |     |     |     |     |
|                                | DMN         | >6 months |     |       | 0   |     |     |     |     |     |
|                                | EMN         | <1 month  |     |       | -2  |     |     |     |     |     |
|                                | EMN         | >6 months | N/A | N/A   | -2  | N/A | N/A | N/A | N/A | N/A |
|                                | LFPN        | <1 month  |     |       | 0   |     |     |     |     |     |
|                                | LFPN        | >6 months |     |       | 0   |     |     |     |     |     |
|                                | LVN         | <1 month  |     |       | 0   |     |     |     |     |     |
|                                | LVN         | >6 months |     |       | 0   |     |     |     |     |     |
|                                | MVN         | <1 month  |     |       | 0   |     |     |     |     |     |
|                                | MVN         | >6 months |     |       | 0   |     |     |     |     |     |
|                                | pDMN        | <1 month  |     |       | 0   |     |     |     |     |     |
|                                | pDMN        | >6 months |     |       | 0   |     |     |     |     |     |
|                                | RFPN        | <1 month  |     |       | 0   |     |     |     |     |     |
|                                | RFPN        | >6 months |     |       | 0   |     |     |     |     |     |
|                                | SMN         | <1 month  |     |       | -2  |     |     |     |     |     |
|                                | SMN         | >6 months |     |       | 2   |     |     |     |     |     |
|                                | Whole brain | <1 month  |     |       | -2  |     |     |     |     |     |
|                                | Whole brain | >6 months |     |       | -1  |     |     |     |     |     |
| Li et. al., 2020 <sup>26</sup> | Insula      | <1 month  | N/A | Equal | N/A | N/A | N/A | N/A | N/A | N/A |
| Li et. al., 2020 <sup>27</sup> | AN          | <1 month  |     |       | -2  |     |     |     |     |     |
|                                | CN          | <1 month  |     |       | -2  |     |     |     |     |     |
|                                | DMN         | <1 month  | N/A | N/A   | 2   | N/A | N/A | N/A | N/A | N/A |
|                                | ECN         | <1 month  |     |       | -2  |     |     |     |     |     |
|                                | SMN         | <1 month  |     |       | -2  |     |     |     |     |     |

|                                   |                    |            |     |     |     |     |     |     |     |     |
|-----------------------------------|--------------------|------------|-----|-----|-----|-----|-----|-----|-----|-----|
|                                   | SN                 | <1 month   |     |     | -2  |     |     |     |     |     |
|                                   | VN                 | <1 month   |     |     | -2  |     |     |     |     |     |
|                                   | Whole brain        | <1 month   |     |     | -1  |     |     |     |     |     |
| Liu et. al., 2020 <sup>28</sup>   | CEN                | <1 month   |     |     | 0   | N/A |     |     |     | N/A |
|                                   | CEN                | <1 month   |     |     | N/A | 0   |     |     |     | N/A |
|                                   | DMN                | <1 month   |     |     | 2   | N/A |     |     |     | N/A |
|                                   | DMN                | <1 month   | N/A | N/A | N/A | 0   | N/A | N/A | N/A | N/A |
|                                   | SN                 | <1 month   |     |     | 2   | N/A |     |     |     | N/A |
|                                   | SN                 | <1 month   |     |     | N/A | 0   |     |     |     | N/A |
|                                   | Whole brain        | <1 month   |     |     | 2   | N/A |     |     |     | -1  |
| Lu et. al., 2020 <sup>29</sup>    | Insula             | <1 month   | N/A | -2  | N/A | N/A | N/A | N/A | N/A | N/A |
| Lu et. al., 2020 <sup>30</sup>    | Hypothalamus       | >6 months  | N/A | -2  | N/A | N/A | N/A | N/A | N/A | N/A |
| Shafi et. al., 2020 <sup>31</sup> | DMN                | >6 months  | 0   |     |     |     |     |     |     |     |
|                                   | FPN                | >6 months  | 0   | N/A | N/A | N/A | N/A | N/A | N/A | N/A |
|                                   | SN                 | >6 months  | 1   |     |     |     |     |     |     |     |
| Chong et. al., 2019 <sup>32</sup> | Amygdala           | <1 month   | 0   |     |     |     |     |     |     |     |
|                                   | Amygdala           | 1-6 months | 0   |     |     |     |     |     |     |     |
|                                   | Anterior cingulate | <1 month   | 0   |     |     |     |     |     |     |     |
|                                   | Anterior cingulate | 1-6 months | 0   |     |     |     |     |     |     |     |
|                                   | Anterior insula    | <1 month   | 0   |     |     |     |     |     |     |     |
|                                   | Anterior insula    | 1-6 months | 0   |     |     |     |     |     |     |     |
|                                   | Caudate            | <1 month   | 0   |     |     |     |     |     |     |     |
|                                   | Caudate            | 1-6 months | 0   |     |     |     |     |     |     |     |
|                                   | Cuneus             | <1 month   | 0   | N/A | N/A | N/A | N/A | N/A | N/A | N/A |
|                                   | Cuneus             | 1-6 months | 0   |     |     |     |     |     |     |     |
|                                   | DLPFC              | <1 month   | 0   |     |     |     |     |     |     |     |
|                                   | DLPFC              | 1-6 months | 0   |     |     |     |     |     |     |     |
|                                   | Fusiform gyrus     | <1 month   | 0   |     |     |     |     |     |     |     |
|                                   | Fusiform gyrus     | 1-6 months | 0   |     |     |     |     |     |     |     |
| Hypothalamus                      | <1 month           | 0          |     |     |     |     |     |     |     |     |
| Hypothalamus                      | 1-6 months         | 0          |     |     |     |     |     |     |     |     |

|  |                           |            |    |  |  |  |  |  |  |
|--|---------------------------|------------|----|--|--|--|--|--|--|
|  | Inferior lateral parietal | <1 month   | 0  |  |  |  |  |  |  |
|  | Inferior lateral parietal | 1-6 months | 0  |  |  |  |  |  |  |
|  | Lingual gyrus             | <1 month   | 0  |  |  |  |  |  |  |
|  | Lingual gyrus             | 1-6 months | 0  |  |  |  |  |  |  |
|  | Middle cingulate          | <1 month   | -2 |  |  |  |  |  |  |
|  | Middle cingulate          | 1-6 months | -2 |  |  |  |  |  |  |
|  | Middle frontal            | <1 month   | 0  |  |  |  |  |  |  |
|  | Middle frontal            | 1-6 months | 0  |  |  |  |  |  |  |
|  | Middle occipital          | <1 month   | -2 |  |  |  |  |  |  |
|  | Middle occipital          | 1-6 months | -2 |  |  |  |  |  |  |
|  | Middle temporal           | <1 month   | 0  |  |  |  |  |  |  |
|  | Middle temporal           | 1-6 months | 0  |  |  |  |  |  |  |
|  | Parieto-occipital         | <1 month   | 0  |  |  |  |  |  |  |
|  | Parieto-occipital         | 1-6 months | 0  |  |  |  |  |  |  |
|  | Posterior cingulate       | <1 month   | 0  |  |  |  |  |  |  |
|  | Posterior cingulate       | 1-6 months | 0  |  |  |  |  |  |  |
|  | Posterior insula          | <1 month   | -2 |  |  |  |  |  |  |
|  | Posterior insula          | 1-6 months | -2 |  |  |  |  |  |  |
|  | Precuneus                 | <1 month   | -2 |  |  |  |  |  |  |
|  | Precuneus                 | 1-6 months | -2 |  |  |  |  |  |  |
|  | Precentral                | <1 month   | 0  |  |  |  |  |  |  |
|  | Precentral                | 1-6 months | 0  |  |  |  |  |  |  |
|  | Primary somatosensory     | <1 month   | 0  |  |  |  |  |  |  |
|  | Primary somatosensory     | 1-6 months | 0  |  |  |  |  |  |  |
|  | Pulvinar                  | <1 month   | -2 |  |  |  |  |  |  |
|  | Pulvinar                  | 1-6 months | -2 |  |  |  |  |  |  |
|  | Secondary somatosensory   | <1 month   | 0  |  |  |  |  |  |  |
|  | Secondary somatosensory   | 1-6 months | 0  |  |  |  |  |  |  |
|  | Somatomotor               | <1 month   | 0  |  |  |  |  |  |  |
|  | Somatomotor               | 1-6 months | 0  |  |  |  |  |  |  |
|  | Spinal trigeminal nucleus | <1 month   | -2 |  |  |  |  |  |  |

|                                       |                            |            |     |     |     |       |     |     |     |     |
|---------------------------------------|----------------------------|------------|-----|-----|-----|-------|-----|-----|-----|-----|
|                                       | Spinal trigeminal nucleus  | 1-6 months | -2  |     |     |       |     |     |     |     |
|                                       | Superior parietal lobule   | <1 month   | 0   |     |     |       |     |     |     |     |
|                                       | Superior parietal lobule   | 1-6 months | 0   |     |     |       |     |     |     |     |
|                                       | Supramarginal gyrus        | <1 month   | 0   |     |     |       |     |     |     |     |
|                                       | Supramarginal gyrus        | 1-6 months | 0   |     |     |       |     |     |     |     |
|                                       | Temporal pole              | <1 month   | 0   |     |     |       |     |     |     |     |
|                                       | Temporal pole              | 1-6 months | 0   |     |     |       |     |     |     |     |
|                                       | Thalamus                   | <1 month   | 0   |     |     |       |     |     |     |     |
|                                       | Thalamus                   | 1-6 months | 0   |     |     |       |     |     |     |     |
|                                       | VMPFC                      | <1 month   | 0   |     |     |       |     |     |     |     |
|                                       | VMPFC                      | 1-6 months | 0   |     |     |       |     |     |     |     |
| Hou et. al., 2019 <sup>33</sup>       | Whole brain                | <1 month   | N/A | N/A | N/A | Equal | N/A | N/A | N/A | N/A |
| Kuceyeski et. al., 2019 <sup>34</sup> | Whole brain                | 1-6 months | N/A | N/A | N/A | 0     | N/A | N/A | N/A | N/A |
|                                       | Whole brain                | >6 months  | N/A | N/A | N/A | 0     | N/A | N/A | N/A | N/A |
| Li et. al., 2019 <sup>35</sup>        | Left middle frontal gyrus  | <1 month   | N/A | -1  | N/A | N/A   | N/A | N/A | N/A | N/A |
|                                       | Whole brain                | <1 month   | N/A | N/A | N/A | -2    | N/A | N/A | N/A | N/A |
| Lu et. al., 2019 <sup>36</sup>        | SN                         | <1 month   | N/A | -1  | N/A | N/A   | N/A | N/A | N/A | N/A |
| Niu et. al., 2019 <sup>37</sup>       | Periaqueductal gray (asym) | <1 month   | N/A | 0   | N/A | N/A   | N/A | N/A | N/A | N/A |
|                                       | Periaqueductal gray (sym)  | <1 month   | N/A | -1  | N/A | N/A   | N/A | N/A | N/A | N/A |
| Dailey et. al., 2018 <sup>38</sup>    | DMN                        | >6 months  | 0   | N/A | N/A | N/A   | N/A | N/A | N/A | N/A |
| Wang et. al., 2018 <sup>39</sup>      | CN (women)                 |            |     |     |     | 0     |     |     |     |     |
|                                       | CN (men)                   |            |     |     |     | 0     |     |     |     |     |
|                                       | DMN (women)                |            |     |     |     | 0     |     |     |     |     |
|                                       | DMN (men)                  |            |     |     |     | 0     |     |     |     |     |
|                                       | EN (women)                 |            |     |     |     | 0     |     |     |     |     |
|                                       | EN (men)                   |            |     |     |     | 0     |     |     |     |     |
|                                       | MN (women)                 | <1 month   | N/A | N/A |     | 0     | N/A | N/A | N/A | N/A |
|                                       | MN (men)                   |            |     |     |     | 2     |     |     |     |     |
|                                       | MTL (women)                |            |     |     |     | 0     |     |     |     |     |
|                                       | MTL (men)                  |            |     |     |     | 0     |     |     |     |     |

|                                        |                                                                                                                                                   |                       |          |     |                                                                                                            |     |     |     |     |     |
|----------------------------------------|---------------------------------------------------------------------------------------------------------------------------------------------------|-----------------------|----------|-----|------------------------------------------------------------------------------------------------------------|-----|-----|-----|-----|-----|
|                                        | VN (women)<br>VN (men)<br>VS (women)<br>VS (men)<br>Whole brain (women)<br>Whole brain (men)                                                      |                       |          |     | 0<br>-2<br>0<br>2<br>0<br>1                                                                                |     |     |     |     |     |
| Xu et. al., 2018 <sup>40</sup>         | Caudate                                                                                                                                           | <1 month              | N/A      | -2  | N/A                                                                                                        | N/A | N/A | N/A | N/A | N/A |
| Dall'Acqua et. al., 2017 <sup>41</sup> | Whole brain<br>Whole brain                                                                                                                        | <1 month<br>>6 months | -2<br>-2 | N/A | N/A                                                                                                        | N/A | N/A | N/A | N/A | N/A |
| Palacios et. al., 2017 <sup>42</sup>   | AUDN<br>BGN<br>CEN<br>CN<br>CON<br>DAN<br>DMN<br>DVS<br>LFPN<br>LSN<br>OCN<br>OFN<br>pDMN<br>RPFN<br>SPN<br>SN<br>USN<br>VAN<br>VN<br>Whole brain | <1 month              | N/A      | N/A | 0<br>0<br>0<br>0<br>0<br>-2<br>-2<br>0<br>0<br>0<br>0<br>-2<br>0<br>-2<br>0<br>0<br>0<br>0<br>0<br>2<br>-1 | N/A | N/A | N/A | N/A | N/A |
| Rajesh et. al., 2017 <sup>43</sup>     | DMN                                                                                                                                               | >6 months             | N/A      | -2  | N/A                                                                                                        | N/A | N/A | N/A | N/A | N/A |

|                                          |                   |            |     |     |     |     |     |     |     |     |
|------------------------------------------|-------------------|------------|-----|-----|-----|-----|-----|-----|-----|-----|
| van der Horn et. al., 2017 <sup>44</sup> | Whole brain       | 1-6 months | N/A | N/A | N/A | 0   | N/A | N/A | N/A | N/A |
| van der Horn et. al., 2017 <sup>45</sup> | DMN               | <1 month   |     |     | 0   |     |     |     |     |     |
|                                          | DMN               | 1-6 months |     |     | 0   |     |     |     |     |     |
|                                          | EN                | <1 month   |     |     | 0   |     |     |     |     |     |
|                                          | EN                | 1-6 months | N/A | N/A | 0   | N/A | N/A | N/A | N/A | N/A |
|                                          | SN                | <1 month   |     |     | 0   |     |     |     |     |     |
|                                          | SN                | 1-6 months |     |     | 0   |     |     |     |     |     |
|                                          | Whole brain       | <1 month   |     |     | 0   |     |     |     |     |     |
| Whole brain                              | 1-6 months        |            |     | 0   |     |     |     |     |     |     |
| Vergara et. al., 2017 <sup>46</sup>      | Whole brain       | >6 months  | N/A | N/A | N/A | N/A | N/A | 2   | N/A | N/A |
| Vergara et. al., 2017 <sup>47</sup>      | Whole brain       | <1 month   | N/A | N/A | 2   | N/A | N/A | N/A | N/A | N/A |
| Yan et. al., 2017 <sup>48</sup>          | Left hippocampus  | <1 month   | N/A | 1   | N/A | N/A | N/A | N/A | N/A | N/A |
|                                          | Left hippocampus  | 1-6 months |     | 2   |     |     |     |     |     |     |
| Yan et. al., 2017 <sup>49</sup>          | Whole brain       | <1 month   | N/A | N/A | N/A | 2   | N/A | N/A | N/A | N/A |
| Zhou et. al., 2017 <sup>50</sup>         | Hypothalamus      | 1-6 months | N/A | -1  | N/A | N/A | N/A | N/A | N/A | N/A |
| Astafiev et. al., 2016 <sup>51</sup>     | Whole brain       | >6 months  | N/A | 1   | N/A | N/A | N/A | N/A | N/A | N/A |
| Banks et. al., 2016 <sup>52</sup>        | DAN               | <1 month   | -1  |     |     |     |     |     |     |     |
|                                          | DAN               | 1-6 months | -1  | N/A | N/A | N/A | N/A | N/A | N/A | N/A |
|                                          | FPC               | <1 month   | -1  |     |     |     |     |     |     |     |
|                                          | FPC               | 1-6 months | -1  |     |     |     |     |     |     |     |
| Iraji et. al., 2016 <sup>53</sup>        | Specific DICCCOLs | 1-6 months | 2   | N/A | N/A | N/A | N/A | N/A | N/A | N/A |
| Nordin et. al., 2016 <sup>54</sup>       | Whole brain       | >6 months  | N/A | -2  | N/A | N/A | N/A | N/A | N/A | N/A |
| van der Horn et. al., 2016 <sup>55</sup> | DMN (asym)        | 1-6 months |     |     | 0   |     |     |     |     |     |
|                                          | DMN (sym)         | 1-6 months |     |     | 0   |     |     |     |     |     |
|                                          | EN (asym)         | 1-6 months | N/A | N/A | 0   | N/A | N/A | N/A | N/A | N/A |
|                                          | EN (sym)          | 1-6 months |     |     | 0   |     |     |     |     |     |
|                                          | SN (asym)         | 1-6 months |     |     | 0   |     |     |     |     |     |



|                                     |                         |            |     |     |     |     |     |     |     |     |
|-------------------------------------|-------------------------|------------|-----|-----|-----|-----|-----|-----|-----|-----|
|                                     | SN (sym)                | 1-6 months |     |     | 0   |     |     |     |     |     |
|                                     | Whole brain (asym)      | 1-6 months |     |     | 0   |     |     |     |     |     |
|                                     | Whole brain (sym)       | 1-6 months |     |     | 0   |     |     |     |     |     |
| Xiong et. al., 2016 <sup>56</sup>   | Whole brain             | 1-6 months | -2  | N/A | N/A | N/A | N/A | N/A | -1  | N/A |
| Yan et. al., 2016 <sup>57</sup>     | Left hippocampus        | 1-6 months | N/A | 2   | N/A | N/A | N/A | N/A | N/A | N/A |
|                                     |                         | >6 months  |     | 2   |     |     |     |     |     |     |
| Bharath et. al., 2015 <sup>58</sup> | Whole brain             | <1 month   | -1  |     |     |     |     |     |     |     |
|                                     | Whole brain             | 1-6 months | -1  | N/A | N/A | N/A | N/A | N/A | N/A | N/A |
|                                     | Whole brain             | >6 months  | -1  |     |     |     |     |     |     |     |
| Iraji et. al., 2015 <sup>59</sup>   | Amygdala                | <1 month   | -1  |     | N/A |     |     |     |     |     |
|                                     | BGN                     | <1 month   | 0   |     | 0   |     |     |     |     |     |
|                                     | DMN                     | <1 month   | -2  | N/A | -2  | N/A | N/A | N/A | N/A | N/A |
|                                     | Hippocampus             | <1 month   | 1   |     | N/A |     |     |     |     |     |
|                                     | Whole brain             | <1 month   | N/A |     | -2  |     |     |     |     |     |
| Mayer et. al., 2015 <sup>60</sup>   | DMN                     | <1 month   |     |     | 0   |     |     | 0   |     |     |
|                                     | Subcortical             | <1 month   | N/A | N/A | 0   | N/A | N/A | 0   | N/A | N/A |
|                                     | Whole brain             | <1 month   |     |     | 0   |     |     | 0   |     |     |
| Sours et. al., 2015 <sup>61</sup>   | DMN (asym)              | <1 month   | 1   |     |     |     |     |     |     |     |
|                                     | DMN (asym)              | >6 months  | 1   | N/A | N/A | N/A | N/A | N/A | N/A | N/A |
|                                     | DMN (sym)               | <1 month   | -1  |     |     |     |     |     |     |     |
|                                     | DMN (sym)               | >6 months  | -1  |     |     |     |     |     |     |     |
| Sours et. al., 2015 <sup>62</sup>   | Thalamus                | <1 month   | 2   | 2   | N/A | N/A | N/A | N/A | N/A | N/A |
| Sours et. al., 2015 <sup>63</sup>   | DLPFC (asym)            | <1 month   | 0   | 0   |     |     |     |     |     |     |
|                                     | DLPFC (asym)            | 1-6 months | 0   | 0   |     |     |     |     |     |     |
|                                     | DLPFC (sym)             | <1 month   | 0   | 0   |     |     |     |     |     |     |
|                                     | DLPFC (sym)             | 1-6 months | -2  | 0   |     |     |     |     |     |     |
|                                     | Lateral parietal (asym) | <1 month   | -2  | 0   | N/A | N/A | N/A | N/A | N/A | N/A |
|                                     | Lateral parietal (asym) | 1-6 months | 0   | -2  |     |     |     |     |     |     |
|                                     | Lateral parietal (sym)  | <1 month   | 0   | 0   |     |     |     |     |     |     |
|                                     | Lateral parietal (sym)  | 1-6 months | 0   | 0   |     |     |     |     |     |     |
|                                     | MTL (asym)              | <1 month   | 0   | 0   |     |     |     |     |     |     |

|                                       |                    |            |     |     |     |     |     |     |     |     |
|---------------------------------------|--------------------|------------|-----|-----|-----|-----|-----|-----|-----|-----|
|                                       | MTL (asym)         | 1-6 months | 0   | 0   |     |     |     |     |     |     |
|                                       | MTL (sym)          | <1 month   | 0   | 0   |     |     |     |     |     |     |
|                                       | MTL (sym)          | 1-6 months | 0   | 0   |     |     |     |     |     |     |
|                                       | Thalamus (asym)    | <1 month   | 0   | 0   |     |     |     |     |     |     |
|                                       | Thalamus (asym)    | 1-6 months | 0   | 0   |     |     |     |     |     |     |
|                                       | Thalamus (sym)     | <1 month   | 0   | 0   |     |     |     |     |     |     |
|                                       | Thalamus (sym)     | 1-6 months | 0   | 0   |     |     |     |     |     |     |
| Sours et. al., 2015 <sup>64</sup>     | DMN                | <1 month   | -1  | 0   |     |     |     |     |     |     |
|                                       | DMN                | 1-6 months | 0   | 0   |     |     |     |     |     |     |
|                                       | DMN                | >6 months  | 0   | 1   | N/A | N/A | N/A | N/A | N/A | N/A |
|                                       | TPN                | <1 month   | 0   | 1   |     |     |     |     |     |     |
|                                       | TPN                | 1-6 months | 0   | 0   |     |     |     |     |     |     |
|                                       | TPN                | >6 months  | 2   | 0   |     |     |     |     |     |     |
| Vergara et. al., 2015 <sup>65</sup>   | Whole brain        | >6 months  | N/A | N/A | 2   | N/A | N/A | N/A | N/A | N/A |
| Zhan et. al., 2015 <sup>66</sup>      | Whole brain        | <1 month   | N/A | N/A | N/A | N/A | N/A | N/A | N/A | -2  |
| Zhou et. al., 2014 <sup>67</sup>      | Thalamus           | 1-6 months | N/A | -2  | N/A | N/A | N/A | N/A | N/A | -2  |
| Messe et. al., 2013 <sup>68</sup>     | Whole brain (asym) | <1 month   |     |     |     | 0   |     |     |     |     |
|                                       | Whole brain (asym) | >6 months  |     |     |     | -1  |     |     |     |     |
|                                       | Whole brain (sym)  | <1 month   | N/A | N/A | N/A | -1  | N/A | N/A | N/A | N/A |
|                                       | Whole brain (sym)  | >6 months  |     |     |     | 0   |     |     |     |     |
| Sours et. al., 2013 <sup>69</sup>     | DMN (asym)         | 1-6 months | -2  | -2  |     |     |     |     |     |     |
|                                       | DMN (sym)          | 1-6 months | -2  | 2   |     |     |     |     |     |     |
|                                       | TPN (asym)         | 1-6 months | 0   | 0   | N/A | N/A | N/A | N/A | N/A | N/A |
|                                       | TPN (sym)          | 1-6 months | 0   | 0   |     |     |     |     |     |     |
| Shumskaya et. al., 2012 <sup>70</sup> | BN                 |            |     |     | 0   |     |     |     |     |     |
|                                       | CN                 |            |     |     | 0   |     |     |     |     |     |
|                                       | DAN                |            |     |     | 0   |     |     |     |     |     |
|                                       | DMN                |            |     |     | 0   |     |     |     |     |     |
|                                       | EN                 |            |     |     | 0   |     |     |     |     |     |
|                                       | LFPN               |            |     |     | 0   |     |     |     |     |     |

|                                       |                                                      |                      |            |     |                                      |     |     |     |     |     |
|---------------------------------------|------------------------------------------------------|----------------------|------------|-----|--------------------------------------|-----|-----|-----|-----|-----|
|                                       | MSN<br>RFPN<br>SMC<br>VAN<br>VS<br>VN<br>Whole brain | <1 month             | N/A        | N/A | -2<br>2<br>0<br>0<br>0<br>0<br>Equal | N/A | N/A | N/A | N/A | N/A |
| Stevens et. al.,<br>2012 <sup>2</sup> | Whole brain                                          | 1-6 months           | N/A        | N/A | -1                                   | N/A | N/A | N/A | N/A | N/A |
| Zhou et. al., 2012 <sup>71</sup>      | DMN                                                  | 1-6 months           | N/A        | -1  | -1                                   | N/A | N/A | N/A | N/A | N/A |
| Mayer et. al.,<br>2011 <sup>72</sup>  | DMN<br>TRN                                           | <1 month<br><1 month | Equal<br>2 | N/A | N/A                                  | N/A | N/A | N/A | N/A | N/A |
| Tang et. al., 2011 <sup>73</sup>      | Thalamus                                             | 1-6 months           | N/A        | 2   | 2                                    | N/A | N/A | N/A | N/A | N/A |

**Supplementary Table 4.** Number of studies and analyses of each ROI/network. Note some analyses involved multiple timepoints since mTBI (<1 month, 1-6 months, >6 months).

\*aDMN = anterior default mode network, AN = attention network, AUDN = auditory network, BGN = basal ganglia network, BN = brainstem network, CCN = cognitive-control network, CEN = central executive network, CLN = cognitive-language network, CN = cerebellum network, CON = cingulo-opercular network, DAN = dorsal attention network, DLPFC = dorsolateral prefrontal cortex, DMN = default mode network, DVS = dorsal and ventral stream, ECN = executive control network, EMN = emotion network, EN = executive network, FPC = fronto-parietal control network, FPN = fronto-parietal network, LFPN = left fronto-parietal network, LSN = lower somatomotor network, LVN = lateral visual network, MN = motor network, MTL = medial temporal lobe, MSN = motor-striatal network, MVN = medial visual network, OFN = orbitofrontal network, pDMN = posterior default mode network, OCN = orbito-cerebellar network, RFPN = right fronto-parietal network, SMC = sensory motor cortex, SMN = sensorimotor network, SN = salience network, SPN = superior parietal network, TPN = task positive network, TRN = task related network, USN = upper somatomotor network, VAN = ventral attention network, VMPFC = ventromedial prefrontal cortex, VN = visual network, VS = ventral stream

| Area             | # Studies | # Analyses | Area                      | # Studies | # Analyses | Area                      | # Studies | # Analyses |
|------------------|-----------|------------|---------------------------|-----------|------------|---------------------------|-----------|------------|
| Whole brain      | 37        | 45         | aDMN                      | 1         | 1          | MVN                       | 1         | 1          |
| DMN              | 25        | 32         | AN                        | 1         | 1          | OCN                       | 1         | 1          |
| SN               | 10        | 13         | Anterior cingulate        | 1         | 1          | OFN                       | 1         | 1          |
| VN               | 8         | 9          | Anterior insula           | 1         | 1          | Parieto-occipital         | 1         | 1          |
| Thalamus         | 5         | 9          | BN                        | 1         | 1          | Periaqueductal gray       | 1         | 1          |
| CN               | 6         | 6          | CCN                       | 1         | 1          | Posterior cingulate       | 1         | 1          |
| TPN              | 3         | 6          | CLN                       | 1         | 1          | Posterior insula          | 1         | 1          |
| EN               | 5         | 5          | CON                       | 1         | 1          | Precentral                | 1         | 1          |
| AUDN             | 4         | 5          | Cuneus                    | 1         | 1          | Precuneus                 | 1         | 1          |
| DAN              | 4         | 5          | DVS                       | 1         | 1          | Primary somatosensory     | 1         | 1          |
| IFPN             | 4         | 5          | ECN                       | 1         | 1          | Pulvinar                  | 1         | 1          |
| IFPN             | 4         | 5          | EMN                       | 1         | 1          | rIFG                      | 1         | 1          |
| rFPN             | 4         | 5          | FPC                       | 1         | 1          | rSTG                      | 1         | 1          |
| SMN              | 4         | 5          | FPN                       | 1         | 1          | Secondary somatosensory   | 1         | 1          |
| VAN              | 3         | 4          | Fusiform gyrus            | 1         | 1          | SMC                       | 1         | 1          |
| BGN              | 3         | 3          | Hippocampus               | 1         | 1          | Somatomotor               | 1         | 1          |
| Hypothalamus     | 3         | 3          | Inferior lateral parietal | 1         | 1          | Specific DICCCOLs         | 1         | 1          |
| DLPFC            | 2         | 3          | Lingual gyrus             | 1         | 1          | Spinal trigeminal nucleus | 1         | 1          |
| MTL              | 2         | 3          | IMFG                      | 1         | 1          | SPN                       | 1         | 1          |
| Amygdala         | 2         | 2          | LSN                       | 1         | 1          | Superior parietal lobule  | 1         | 1          |
| Caudate          | 2         | 2          | LVN                       | 1         | 1          | Supramarginal gyrus       | 1         | 1          |
| Insula           | 2         | 2          | Middle cingulate          | 1         | 1          | Temporal pole             | 1         | 1          |
| L hippocampus    | 2         | 2          | Middle frontal            | 1         | 1          | TRN                       | 1         | 1          |
| pDMN             | 2         | 2          | Middle occipital          | 1         | 1          | USN                       | 1         | 1          |
| VS               | 2         | 2          | Middle temporal           | 1         | 1          | VMPFC                     | 1         | 1          |
| Lateral parietal | 1         | 2          | MN                        | 1         | 1          | White matter              | 1         | 1          |
| Subcortical      | 1         | 2          | MSN                       | 1         | 1          |                           |           |            |

**Supplementary Table 5.** Metrics evaluated by every study that used graph theory to look at functional connectivity (FC) changes.

With regard to FC change, 2 means that relative to healthy controls, only decreased FC changes were seen in mTBI patients. -1 means more areas of decreased FC change than areas of increased FC change were seen. 0 means no FC changes were seen. Equal means the same number of areas of decreased and increased FC were seen. 1 means more areas of increased FC change than areas of decreased FC change were seen. 2 means only areas of increased FC changes were seen. For Messe et. al., 2013<sup>68</sup>, see Supplementary Table 3 for detailed FC change.

| Author, Year                     | Metrics                                                                                                                                                                | FC Change |
|----------------------------------|------------------------------------------------------------------------------------------------------------------------------------------------------------------------|-----------|
| Kim et. al., 2022 <sup>12</sup>  | Betweenness Centrality<br>Clustering Coefficient<br>Global Efficiency<br>Local Efficiency<br>Strength                                                                  | -1        |
| Li et. al., 2022 <sup>13</sup>   | Clustering Coefficient<br>Global Efficiency<br>Local Efficiency<br>Rich Club Connectivity<br>Shortest Path Length<br>Small-world Parameters                            | 2         |
| Li et. al., 2022 <sup>14</sup>   | Clustering Coefficient<br>Degree Centrality<br>Global Efficiency<br>Local Efficiency<br>Small-world Parameters                                                         | 1         |
| Shi et. al., 2021 <sup>20</sup>  | Clustering Coefficient<br>Global Efficiency<br>Local Efficiency                                                                                                        | -1        |
| Sun et. al., 2021 <sup>21</sup>  | Betweenness Centrality<br>Clustering Coefficient<br>Global Efficiency<br>Local Efficiency                                                                              | -2        |
| Wang et. al., 2021 <sup>74</sup> | Betweenness Centrality<br>Characteristic Path Length<br>Clustering Coefficient<br>Degree Centrality<br>Global Efficiency<br>Local Efficiency<br>Small-world Parameters | 0         |
| Liu et. al., 2020 <sup>28</sup>  | Clustering Coefficient<br>Path Length                                                                                                                                  | 0         |
| Hou et. al., 2019 <sup>33</sup>  | Clustering Coefficient                                                                                                                                                 | Equal     |

|                                          |                                                                                                                                                                                                     |          |
|------------------------------------------|-----------------------------------------------------------------------------------------------------------------------------------------------------------------------------------------------------|----------|
|                                          | Minimum Spanning Tree Weight<br>Shortest Path                                                                                                                                                       |          |
| Kuceyeski et. al., 2019 <sup>34</sup>    | Clustering Coefficient<br>Degree<br>Global Efficiency<br>Mean First Passage Time<br>Mean Navigation Time<br>Modularity<br>Local Efficiency<br>Path Length<br>Small-world Parameters<br>Transitivity | 0        |
| Li et. al., 2019 <sup>35</sup>           | Degree Centrality                                                                                                                                                                                   | -2       |
| van der Horn et. al., 2017 <sup>44</sup> | Betweenness Centrality<br>Clustering Coefficient<br>Degree<br>Eigenvector Centrality<br>Global Efficiency<br>Local Efficiency<br>Strength                                                           | 0        |
| Yan et. al., 2017 <sup>49</sup>          | Characteristic Path Length<br>Clustering Coefficient<br>Global Efficiency<br>Local Efficiency                                                                                                       | 2        |
| Messe et. al., 2013 <sup>68</sup>        | Assortativity<br>Cost<br>Edge Diversity<br>Global Efficiency<br>Hierarchy<br>Local Efficiency<br>Modularity<br>Nodal Diversity<br>Robustness<br>Small-world Parameters<br>Strength                  | 0 and -1 |
